# Supplementary material for: Researching New Drug Combinations with Senolytic Activity Using Senescent Human Lung Fibroblasts MRC-5 Cell Line
Source: MDPI journal article supplement (doi:10.3390/ph17010070), 2024-01-04
Supplement: s1 [file s1]

## Supplementary material

Article: Researching new drug combinations with senolytic activity using senescent human lung fibroblasts MRC-5 cell line.

Authors: Maria Carolina Ximenes de Godoy, Juliana Alves Macedo and Alessandra Gambero.

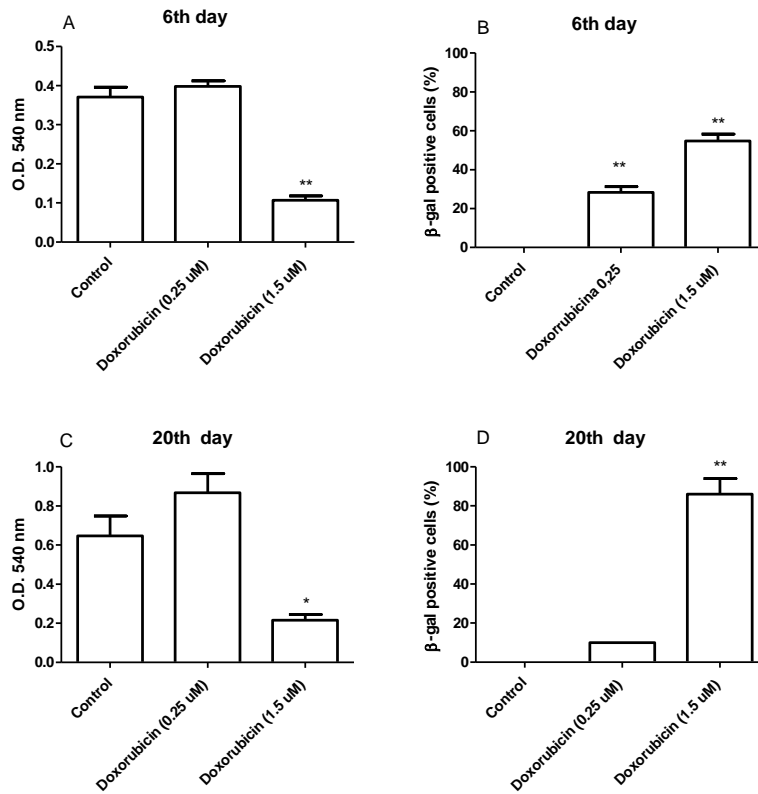

Figure S1: Proliferation and  $\beta$ -gal positive MRC-5 cells after 6 and 20 days of 24 h treatment with doxorubicin 0.25 and 1.5  $\mu$ M). The experiment was carried out in triplicate with one repetition. \* p<0.05 when compared to non-treated MRC-5 cells and \*\* p<0.01 when compared to non-treated MRC-5 cells

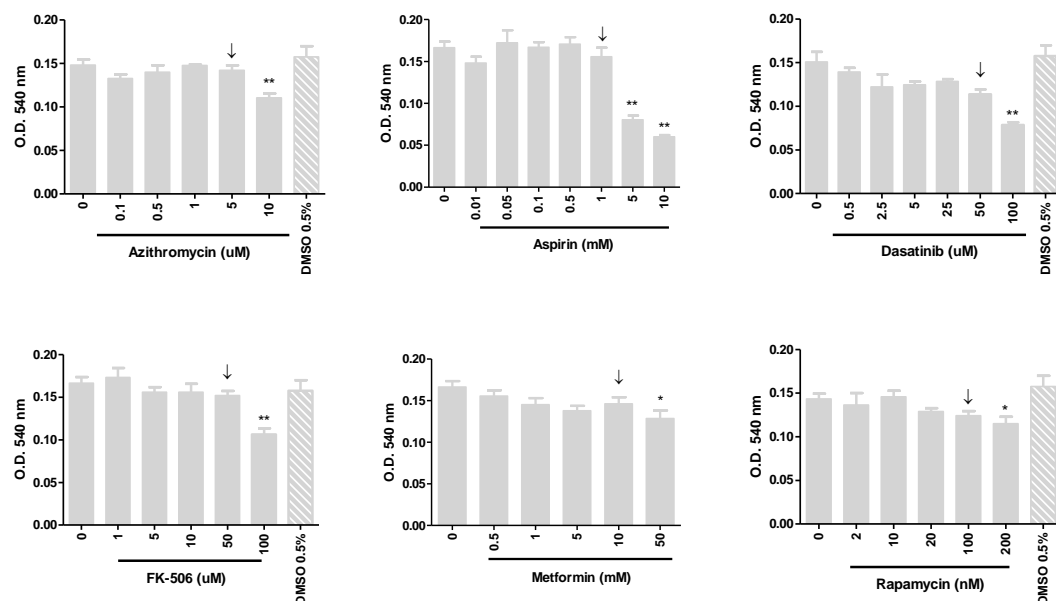

Figure S2: Cytotoxicity evaluated in control MRC-5 cells incubated during 24 h with a concentration range of the drugs Azithromycin (0.1-10  $\mu\text{M}$ ), Aspirin (0.01-10 mM), Dasatinib (0.5-100  $\mu\text{M}$ ), FK-506 (1-100  $\mu\text{M}$ ), Metformin (0.5-50 mM) and Rapamycin (2-200 nM). The experiment was carried out in triplicate with one repetition. \*  $p < 0.05$  and \*\*  $p < 0.01$  when compared to non-treated MRC-5 cells. The arrows show the concentration chosen for each drug for subsequent assays.

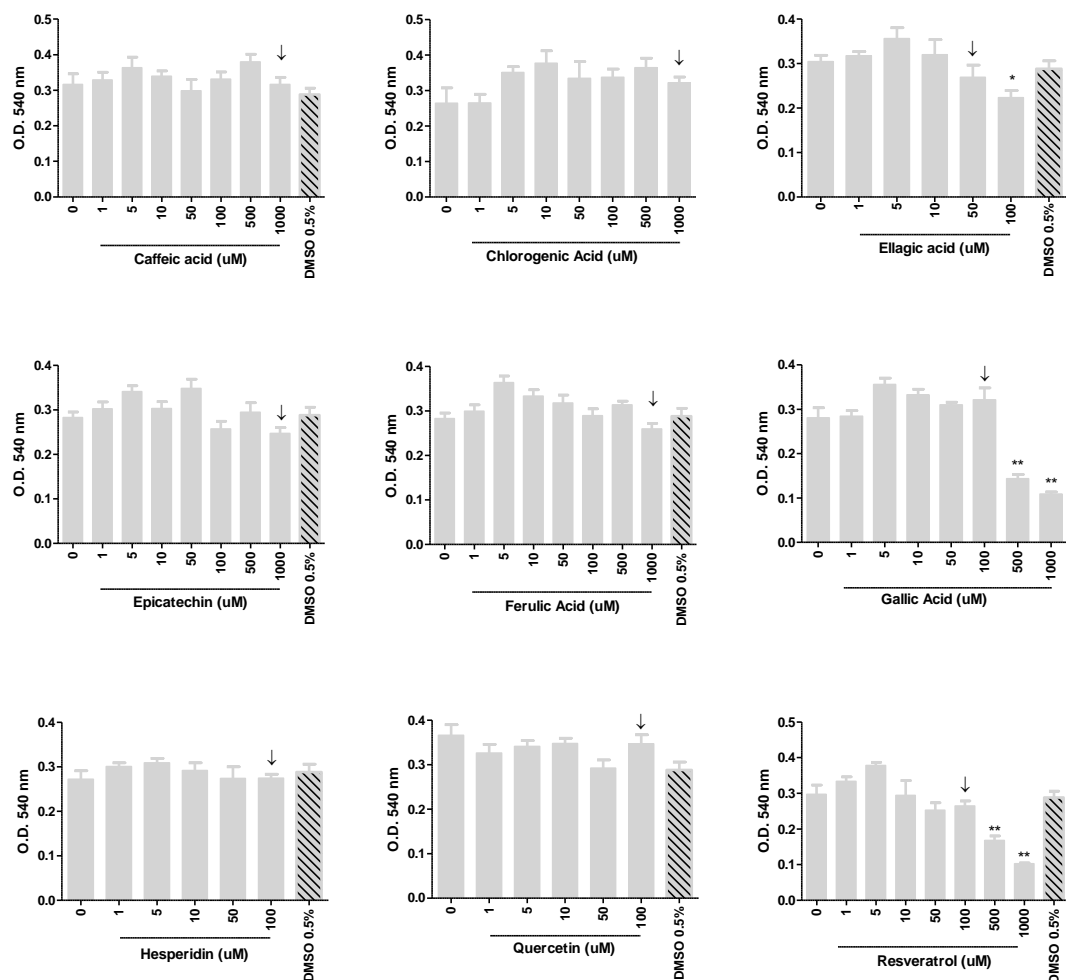

Figure S3: Cytotoxicity evaluated in control MRC-5 cells incubated during 24 h with a concentration range of the polyphenols caffeic acid (1-1000  $\mu$ M), chlorogenic acid (1-1000  $\mu$ M), ellagic acid (1-100  $\mu$ M), epicatechin (1-1000  $\mu$ M), ferulic acid (1-1000  $\mu$ M), gallic acid (1-1000  $\mu$ M), hesperidin (1-100  $\mu$ M), quercetin (1-100  $\mu$ M) and resveratrol (1-1000  $\mu$ M). The experiment was carried out in triplicate with one repetition. \*\* p<0.01 and \* p<0.05 when compared to non-treated MRC-5 cells. The arrows show the concentration chosen for each polyphenol for subsequent assays.

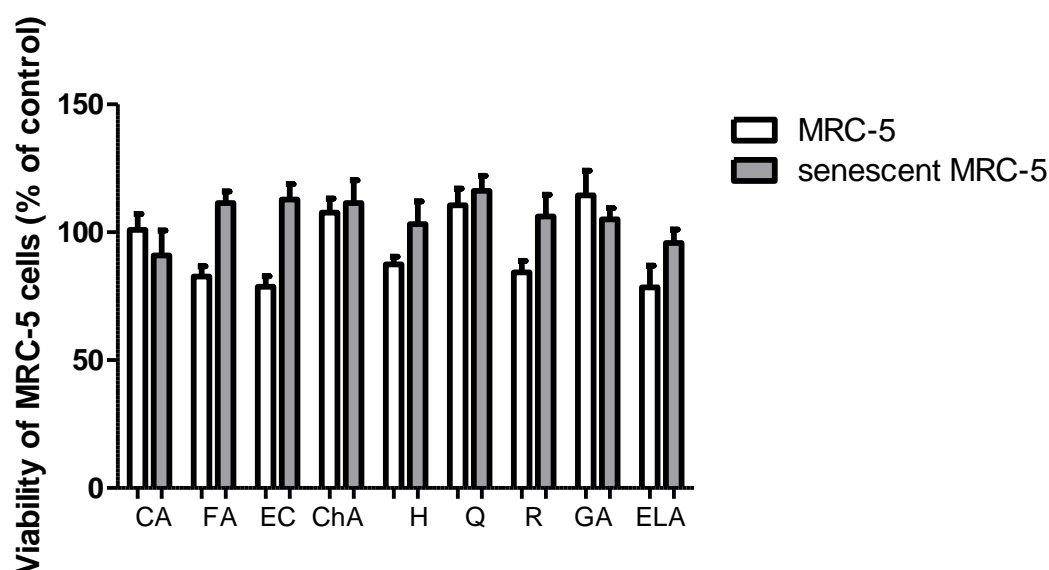

Figure S4: Cytotoxic activity in MRC-5 cells or senescent MRC-5 cells by isolated caffeic acid (CA, 1000  $\mu$ M), chlorogenic acid (ChA, 1000  $\mu$ M), ellagic acid (50  $\mu$ M), epicatechin (EC, 1000  $\mu$ M), ferulic acid (FA, 1000  $\mu$ M), gallic acid (100  $\mu$ M), hesperidin (100  $\mu$ M), quercetin (100  $\mu$ M) or resveratrol (100  $\mu$ M). The experiments were carried out in triplicate with one repetition.

Table S1: Primers sequence

| Gene    | Forward               | Reverse              |
|---------|-----------------------|----------------------|
| CDKN2A  | GAGCAGCATGGAGCCTTC    | CGTAACTATTCGGTGCGTTG |
| CDKN1A  | TCACTGTCTTGTTACCTTGTC | GGCGTTTGGAGTGGTAGAAA |
| b-actin | CCAACCGCGAGAAGATGA    | CCAGAGGCGTACAGGGATAG |

Table S2: Viability of control and senescent MRC-5 after 24 h dasatinib, ellagic acid, quercetin and resveratrol isolated or in combination and percentage of viability reduction of senolytic combinations.

| Drug                     | Control MRC-5 viability | Senescent MRC-5 viability | % reduction |
|--------------------------|-------------------------|---------------------------|-------------|
| Dasatinib                | 81.9 $\pm$ 1.1          | 80.4 $\pm$ 5.8            | 9.8         |
| Ellagic acid             | 78.5 $\pm$ 8.4          | 95.8 $\pm$ 5.3            | -           |
| Quercetin                | 110.6 $\pm$ 6.4         | 116.1 $\pm$ 5.9           | -           |
| Resveratrol              | 84.3 $\pm$ 4.5          | 106.2 $\pm$ 8.5           | -           |
| Dasatinib + Ellagic Acid | 107.8 $\pm$ 8.9         | 46.7 $\pm$ 6.7            | 43.3        |
| Dasatinib + Quercetin    | 105.3 $\pm$ 7.7         | 51.7 $\pm$ 6.5            | 49.2        |
| Dasatinib + Resveratrol  | 84.43 $\pm$ 0.4         | 37.1 $\pm$ 7.4            | 43.9        |
